# Supplementary material
Source: Springer Nature journal article supplement (https://www.springermedizin.de/resource/supplementary/12969_2014_2175_MOESM1_ESM.pdf/9590730)

FR 54Hz  
5.0cm

M3

2D  
63%  
C 50  
P Off  
HRes

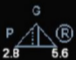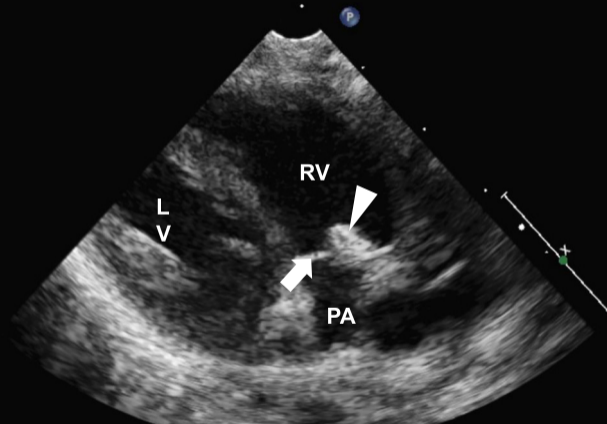

JPEG

Supplement: MOESM1 [file 9590730]
